# Supplementary material for: A microRNA signature and TGF-β1 response were identified as the key master regulators for spaceflight response
Source: PubMed Central journal article supplement (PMC6059388; doi:10.1371/journal.pone.0199621), 2018-07-25
Supplement: pone.0199621.s005.pdf [file pone.0199621.s005.pdf]

| Predicted miRNAs | Activation z-score | p-value of overlap | Target molecules in dataset                                                                                                                          |
|------------------|--------------------|--------------------|------------------------------------------------------------------------------------------------------------------------------------------------------|
| miR-16-5p        | 2.728              | 3.40E-05           | CCND1, CCND2, CDC25A, CHEK1, HSP90B1, IGF1R, IL6, JUN, MAP2K1, PTGS2, TPM3                                                                           |
| mir-34           | 2.392              | 1.82E-05           | CCND1, CCND2, CDC25A, CDK4, LEF1, MYC                                                                                                                |
| miR-145-5p       | 2.328              | 2.11E-08           | ACTA2, CDK4, FSCN1, IGF1R, IRS1, MYC, PPP3CA, SERPINE1, TPM3                                                                                         |
| miR-125b-5p      | 2.208              | 1.44E-05           | CD44, CDC25A, ID1, ID3, IL6R, JUN, MAP2K1, NOS2                                                                                                      |
| let-7            | 1.106              | 3.01E-13           | ACTA2, BRCA1, CCND1, CD44, CDC25A, CHEK1, COL1A1, COL1A2, GAB2, IGF1R, IL6, IL6R, ITGA4, KRAS, LEF1, MYC, PTGS2, TLR4                                |
| mir-21           | 0.387              | 4.42E-13           | ACTA2, ARF6, CD274, CDC25A, CDKN1A, COL1A1, FCGR2A, ICAM1, IL1B, IL36G, IL6, IRAK1, MMP9, NLRC5, PPARA, PTEN, SESN1, SMC2, STAT1, TGFB1, TLR4, YWHAB |
| mir-223          | 0.016              | 2.84E-12           | ABCB1, ACTA2, CCR3, CD274, E2F1, HMGCS1, ICAM1, IGF1R, IL1A, IL1B, IL6, LEP1, LPL, MEF2C, TLR4, TLR7                                                 |
| miR-26a-5p       | 1.334              | 1.49E-11           | CCND2, CDK4, CDKN1A, EPHA2, GSK3B, MYC, PTEN, PTGS2, TGFBR2                                                                                          |
| mir-146          | 0.669              | 5.95E-11           | CD40, DUSP1, IL1B, IL6, IRAK1, MYC, PDGFRA, PTGS2, STAT1, TLR4                                                                                       |
| mir-25           | -0.593             | 8.51E-10           | BAX, CDKN1A, E2F1, GADD45A, IL6, ITGA5, PTEN, TP63                                                                                                   |
| miR-217-5p       | 0.928              | 1.12E-09           | ACACA, FASN, IRS1, PPARA, PPARGC1A, PTEN                                                                                                             |
| miR-17-5p        | -0.355             | 2.32E-09           | CCND1, CCND2, CDKN1A, E2F1, PPARA, PPARG, PTEN, TGFBR2, TLR7, TP63                                                                                   |
| miR-24-3p        | 0.416              | 1.17E-08           | BAX, BRCA1, CDK4, IL6, MYC, SMAD3, TGFB1                                                                                                             |
| miR-92a-3p       | 0.535              | 2.80E-08           | CCND1, CCND2, CDKN1A, IL6, ITGA5, PTEN, TP63                                                                                                         |
| miR-21-5p        | -0.093             | 2.88E-08           | ACTA2, CDC25A, CDKN1A, FAS, IL6R, IRAK1, PTEN, SESN1, TGFBR2                                                                                         |
| mir-145          | 1.296              | 3.41E-08           | ACTA2, CACNA1C, FSCN1, IL6, IRS1, MYC, PDGFRA, PRKCE                                                                                                 |
| miR-155-5p       | 0.997              | 5.51E-08           | AGTR1, CCND1, CEBPB, CTNNB1, IL1A, IL1B, IL6, KRAS, LPL, NOS2, PDE3A, PTGS2, SERPINE1                                                                |
| mir-10           | 0.528              | 6.29E-08           | BAX, CD40, CD44, E2F1, GAB2, IGF1R, IL6, IL6R, PPP2CA, RPS6KA1                                                                                       |
| miR-204-5p       | -0.186             | 1.62E-07           | ARPC1B, CDC25B, MMP9, PPARG, PTPN11, SOX4                                                                                                            |
| miR-34a-5p       | 0.613              | 1.88E-07           | CCND1, CDK4, CDKN1A, E2F1, ICAM1, MAP2K1, MYC, PPARG                                                                                                 |
| miR-141-3p       | 0.152              | 2.53E-07           | BAX, COL1A2, CTNNB1, GADD45A, ITGB1, LEP1, STAT5B, TP73                                                                                              |
| let-7a-5p        | 0.96               | 2.64E-07           | ACTA2, CCND1, CCND2, CDC25A, COL1A1, COL1A2, ITGA4, KRAS, MMP9, MYC, PTGS2, TLR4                                                                     |
| miR-146a-5p      | -1.888             | 1.07E-06           | BRCA1, CCR3, CD40, IL36G, IRAK1, NFKBIA, NOS2, STAT1, TLR4                                                                                           |
| mir-27           | -1.296             | 2.49E-06           | ABCB1, IL1B, IL6, KRAS, PPARA, PPARG, PTGS2                                                                                                          |
| mir-24           | 0.896              | 3.68E-06           | CDK4, CDKN1A, IL6, MYC, SERPINE1, TGFB1                                                                                                              |
| mir-33           | 0.728              | 3.83E-06           | ACACA, CPT1A, LPL, PPARG, PPARGC1A                                                                                                                   |
| mir-155          | 0.508              | 3.98E-06           | AGTR1, CCND1, CDKN1A, CEBPB, IL1B, IL6, NOS2, PTGS2, SERPINE1                                                                                        |
| mir-373          | 0.585              | 8.69E-06           | CD44, IL6, SERPINE1, TGFBR2                                                                                                                          |

|             |        |          |                                                       |
|-------------|--------|----------|-------------------------------------------------------|
| mir-127     | -0.868 | 1.24E-05 | DUSP1, IL1B, IL6, NOS2                                |
| mir-15      | 1.128  | 1.26E-05 | CCND1, CCND2, CHEK1, IL1B, IL6, MMP9, PTGS2           |
| mir-515     | 0.739  | 1.72E-05 | CD44, IL6, SERPINE1, TGFBR2                           |
| mir-7       | 0.264  | 1.72E-05 | BAX, CDKN1A, IGF1R, PIK3R3                            |
| miR-503-5p  | 1.188  | 2.33E-05 | CCND1, CDC25A, CDKN1A, CHEK1                          |
| miR-18a-5p  | -1.982 | 2.33E-05 | CDKN1A, E2F1, KRAS, TP63                              |
| mir-192     | 1.082  | 3.99E-05 | ACTA2, CDKN1A, IGF1R, NOD2                            |
| mir-1       | 0.524  | 4.57E-05 | CCND2, CEBPB, HSP90B1, HSPD1, IGF1R, KRAS, MMP9, MYLK |
| mir-30      | -0.73  | 4.62E-05 | BAX, CDKN1A, GADD45A, IL6, SERPINE1                   |
| mir-143     | -0.246 | 5.08E-05 | KRAS, PDGFRA, PRKCE, PTGS2                            |
| mir-17      | -0.148 | 5.57E-05 | CCND1, CDKN1A, E2F1, FAS, LEF1, PTEN                  |
| miR-23a-3p  | 0.192  | 7.89E-05 | CXCL12, IL6R, PTEN, SMAD3                             |
| miR-296-5p  | 0.132  | 7.89E-05 | ABCB1, BAX, CCND1, COL1A1                             |
| mir-19      | -0.94  | 9.66E-05 | CDKN1A, E2F1, PTEN, TP63                              |
| miR-27a-3p  | -1.103 | 1.03E-04 | ADORA2B, BAX, MEF2C, PPARG, SMAD3                     |
| mir-133     | 0.669  | 1.47E-04 | CCND2, FSCN1, GSTP1, IGF1R, PPARG                     |
| miR-199a-5p | 0.128  | 1.77E-04 | ACTA1, CDKN1A, COL1A1, ID3, TGFBR2, TGFBR3            |
| mir-181     | -0.092 | 1.82E-04 | DUSP6, GRIA2, PRKCD, PTEN, PTPN11                     |
| miR-221-3p  | 0.153  | 3.10E-04 | DDIT4, FOS, ICAM1, PTEN                               |
| miR-30c-5p  | 0.378  | 3.14E-04 | ATP2A2, GPD2, IL6, JUN, PPARG, PPP3CA, PTPRK          |
| mir-8       | 1.619  | 4.79E-04 | CDC25B, CTNNB1, ITGB1, PTEN, YWHAB, YWHAG             |
| miR-291a-3p | 0.841  | 6.14E-04 | CCND1, CCND2, CD44, CD83, CDKN1A, TP63                |
| mir-322     |        | 8.69E-05 | CDC25A, IGF1R, MAP2K1                                 |
| miR-451a    |        | 1.83E-04 | ABCB1, CCND1, MMP9                                    |
| mir-218     |        | 4.25E-04 | LEF1, PDGFRA, VAV3                                    |
| miR-100-5p  |        | 5.36E-04 | CCND1, ID1, IGF1R                                     |
| miR-143-3p  |        | 6.64E-04 | KRAS, PDGFRA, PRKCE                                   |
| mir-221     |        | 8.11E-04 | MMP9, PTEN, STAT5A                                    |
| miR-132-3p  |        | 8.11E-04 | GRIN2A, MMP9, SOX4                                    |
| miR-515-5p  |        | 8.19E-04 | PIK3C2B, TCF7L1                                       |
| miR-193a-5p |        | 8.19E-04 | IL2RG, TP73                                           |
| mir-26      |        | 9.76E-04 | CCND2, PTEN, PTGS2                                    |
| mir-503     |        | 1.35E-03 | CDC25A, IGF1R                                         |
| miR-7a-5p   |        | 1.37E-03 | FOS, IGF1R, IRS1                                      |
| mir-214     |        | 1.37E-03 | IGF1R, PTEN, PTGS2                                    |
| mir-183     |        | 1.59E-03 | IRS1, ITGB1, PTEN                                     |
| mir-103     |        | 2.41E-03 | CACNA1C, FASN, PRKCE                                  |
| mir-296     |        | 2.80E-03 | COL1A1, IL1B                                          |
| miR-491-5p  |        | 2.80E-03 | MMP9, PTK2                                            |
| mir-224     |        | 2.80E-03 | CDKN1A, MMP9                                          |
| miR-140-5p  |        | 3.70E-03 | CXCL12, SMAD3                                         |

|               |  |          |                      |
|---------------|--|----------|----------------------|
| mir-132       |  | 4.27E-03 | GRIN2A, PTEN, SOX4   |
| miR-193a-3p   |  | 4.72E-03 | CCND1, PTK2          |
| mir-194       |  | 4.72E-03 | ACTA2, E2F1          |
| mir-101       |  | 7.11E-03 | DUSP1, PTGS2         |
| miR-214-3p    |  | 7.11E-03 | BAX, PTEN            |
| miR-96-5p     |  | 8.46E-03 | IRS1, KRAS           |
| miR-223-3p    |  | 9.92E-03 | IRS1, MEF2C          |
| miR-19b-3p    |  | 9.92E-03 | CCND1, PTEN          |
| mir-196       |  | 1.15E-02 | COL1A1, FOS          |
| mir-130       |  | 1.15E-02 | ABCB1, PPARA         |
| miR-513a-5p   |  | 1.18E-02 | CD274                |
| miR-18a-3p    |  | 1.18E-02 | KRAS                 |
| miR-545-3p    |  | 1.18E-02 | BRCA1                |
| miR-574-3p    |  | 1.18E-02 | TP63                 |
| miR-216a-5p   |  | 1.18E-02 | PTEN                 |
| miR-330-3p    |  | 1.18E-02 | E2F1                 |
| mir-493       |  | 1.18E-02 | IGF1R                |
| miR-205-5p    |  | 1.49E-02 | PRKCE, PTEN          |
| mir-205       |  | 1.49E-02 | CTNNB1, PRKCE        |
| mir-203       |  | 1.68E-02 | MMP9, TP63           |
| miR-199a-3p   |  | 1.68E-02 | CD44, PTGS2          |
| miR-133a-3p   |  | 2.23E-02 | FSCN1, IGF1R, PTPRK  |
| miR-16-1-3p   |  | 2.35E-02 | CHEK1                |
| miR-511-5p    |  | 2.35E-02 | TLR4                 |
| miR-185-3p    |  | 2.35E-02 | MYC                  |
| mir-95        |  | 2.35E-02 | BRCA1                |
| mir-485       |  | 2.35E-02 | GRIA2                |
| mir-383       |  | 2.35E-02 | MYC                  |
| miR-1298-5p   |  | 2.35E-02 | PTK2                 |
| miR-181a-5p   |  | 3.23E-02 | GRIA2, KRAS          |
| miR-2682-5p   |  | 3.50E-02 | MYC                  |
| miR-424-3p    |  | 3.50E-02 | CHEK1                |
| miR-615-3p    |  | 3.50E-02 | PPARG                |
| miR-370-3p    |  | 3.50E-02 | MAP3K8               |
| mir-489       |  | 3.50E-02 | PTPN11               |
| mir-499       |  | 3.50E-02 | PPP3CA               |
| miR-125b-1-3p |  | 3.50E-02 | IL1B                 |
| mir-149       |  | 3.50E-02 | E2F1                 |
| mir-126       |  | 3.74E-02 | CXCL12, IRS1         |
| miR-29b-3p    |  | 3.99E-02 | COL1A1, COL1A2, PTEN |
| mir-22        |  | 4.01E-02 | CDKN1A, LEF1         |

|               |  |          |                   |
|---------------|--|----------|-------------------|
| mir-135       |  | 4.01E-02 | CXCL12, IL1B      |
| mir-128       |  | 4.64E-02 | BAX               |
| miR-191-5p    |  | 4.64E-02 | IL6               |
| miR-125b-2-3p |  | 4.64E-02 | BAX               |
| mir-574       |  | 4.64E-02 | TP63              |
| miR-328-3p    |  | 4.64E-02 | CD44              |
| miR-149-5p    |  | 4.64E-02 | E2F1              |
| miR-378a-3p   |  | 4.64E-02 | IGF1R             |
| mir-29        |  | 4.81E-02 | COL1A1, LPL, PTEN |

**Supplemental Table 1.** Predicted microRNAs (miRNAs) from the all key genes determined through Ingenuity Pathway Analysis (IPA). Activation Z-scores > 0 will predict the miRNA is activated and activation Z-scores < 0 will predict the miRNAs are inhibited. The bold miRNAs are the top miRNAs which were used in our analysis.
